# Supplementary material
Source: Elsevier journal article supplement (https://www.sciencedirect.com/science/article/pii/S0085562617301401)
Supplement: mmc1 [file S0085562617301401:mmc1.docx]

**SUPPORTING INFORMATION**

**Synthesis of new α-amino nitriles with insecticidal action on *Aedes aegypti***

Andrés G. Rueda1, Aurora L. Carreño Otero1, Jonny E. Duque L.2*, Vladimir V. Kouznetsov 1*

1 Laboratorio de Química Orgánica y Biomolecular, Universidad Industrial de Santander, Parque Tecnológico Guatiguará, Km 2 vía refugio, Piedecuesta, A.A. 681011, Colombia.

2 Centro de investigaciones en enfermedades tropicales CINTROP - UIS, Escuela de Medicina, Universidad Industrial de Santander, A.A. 678, Bucaramanga, Colombia.

| **Table of Contents** | | **Pages** |
| --- | --- | --- |
|  | | |
| **1** | ***In silico* calculation of compound 3-11 and insectides used as positive control** | S2-S3 |
| **2**  **3** | **General methods**  **Products Spectroscopic and spectrometric data** | S4  S5-S8 |
| **4** | **1H- and 13C NMR spectra of the compounds** **3**-**11** | S9-S17 |
| **5** | **ESI-MS and FTIR spectra of the compounds** **3**-**11**. | S18-S26 |

**Table S1.** Calculation with software Osiris® Property Explorer

| Comp. | Toxic risks predictiona | | | | Molecular properties calculation | | | |
| --- | --- | --- | --- | --- | --- | --- | --- | --- |
| Mut | Tumo | Irrit | Rep | CLP | LogS | D-L | D-S |
| **3** | -b | - | - | - | 1.88 | -2.32 | -3.03 | 0.49 |
| 4 | - | - | - | - | 2.15 | -2.48 | -0.01 | 0.69 |
| **5** | - | - | - | - | 2.08 | -2.5 | 1.55 | 0.83 |
| **6** | - | - | - | - | 2.33 | -3.18 | -0.27 | 0.63 |
| **7** | - | - | M | - | 2.2 | -2.7 | -2.55 | 0.39 |
| **8** | - | - | M | - | 2.13 | -2.72 | -1.02 | 0.45 |
| **9** | - | - | M | - | 2.38 | -3.39 | -2.83 | 0.36 |
| **10** | - | - | - | - | 1.54 | -2.05 | -0.53 | 0.65 |
| **11** | - | - | - | - | 0.71 | -1.43 | -2.23 | 0.53 |
| Propoxur | -- | -- | -- | -- | 1.93 | -2.05 | -0.01 | -- |
| Temephos | -- | -- | -- | -- | 6.02 | -7.12 | -1.09 | -- |

a.Mut = mutagenic, Tum = tumorogenic, Irrit = irritant, Rep = reproductive effects. b.L = Low risk. c.M = Medium risk. d.MW = molecular weight, CLP = cLogP, LogS = solubility, D-L = Drug Likeness, D-S = Drug-Score.

**Table S2.** Anti-AChE activity (IC50, µg/mL) of synthesized compounds **3-11**.

| Comp. | M.W  (g/mol) | IC50  (µg/mL) | IC50  (µM) |
| --- | --- | --- | --- |
| **3** | 230.31 | 50.05 | 217.32 |
| **4** | 244.00 | 36.31 | 148.80 |
| **5** | 274.36 | 43.78 | 159.55 |
| **6** | 258.32 | 42.11 | 163.02 |
| **7** | 244.00 | 53.84 | 220.65 |
| **8** | 274.36 | 40.00 | 145.80 |
| **9** | 258.32 | 42.96 | 166.29 |
| **10** | 216.28 | 51.64 | 238.74 |
| **11** | 232.28 | 60.25 | 259.40 |
| Prop.a | 209.24 | 0.0150 | 0.07 |

a.Propoxur, insecticide and acetylcholinesterase inhibitor.

**General methods**

**Chemistry**

In a 50 mL round-bottom flask equipped with a magnetic stirrer, precursors are added with a molar relation of 1:1.3 (aldehyde **1**: amine **2**) keeping stirring for 30 minutes in laboratory temperature (20°C), subsequently, 10 mL of acetonitrile (MeCN), potassium cyanide (KCN) in relation of 1:1.5 (amine: KCN) and 0.80 g of SSA catalyst were added to the flask. After 18 h of reaction, the product is removed from the mixture with the catalyst and the KCN by filtration, then a liquid-liquid extraction (CH2Cl2) is performed and this is concentrated in a rotary evaporator. The concentrated product is then purified in an aluminum oxide column with different concentration mixtures of petroleum ether/ethyl acetate for obtaining the pure product **3-11**.

***2-(4-Methoxyphenyl)-2-(piperidin-1-yl) acetonitrile (3).***

Yield 66 %; white solid, m.p. 78-79 °C. IR (KBr): 2222 (νCN ), 1250 (νC-O-CH3), 849, 818 (νAr) cm-1. 1H-NMR (400 MHz, CDCl3): *δ* 7.43 (2H, dd, *J* = 8.3, 2.9 Hz, 2,6-HAr), 6.90 (2H, dd, *J* = 8.8, 3.0 Hz, 3,5-HAr), 4.76 (1H, s, 1-H), 3.81 (3H, s, OCH3), 2.51 (4H, ddd, *J* = 10.7, 6.9, 3.9 Hz, 2,6-HPip), 1.59 (4H, pd, *J* = 13.0, 6.8 Hz, 3,5-HPip), 1.47 (2H, dd, *J* = 5.5, 5.5 Hz, 4-HPip). 13C-NMR (CDCl3, 100 MHz): *δ* 159.9, 129.2 (2C), 125.6, 116.0, 114.0 (2C), 62.6, 55.3, 51.0 (2C), 25.9 (2C), 24. ESI-MS: m/z = 483.1 (2M+. +Na), 253.2 (M+.+ Na), 231.3 (M+.+ H), 204.4. Anal. Calcd for C14H18N2O: C, 73.01; H, 7.88; N, 12.16. Found: C, 73.01; H, 7.88; N, 12.16.

***2-(4-Methoxyphenyl)-2-(4-methylpiperidin-1-yl) acetonitrile (4****).*

Yield 88%, white solid, m.p. 95-96 °C. IR (KBr): 2931, 2885 (νCH3), 2221 (νCN), 1604, 1511, 1450 (δAr), 1265 (νC-O-CH3), 833 (νAr) cm-1. 1H-NMR (400 MHz, CDCl3): *δ* 7.43 (2H, dd, *J* = 8.4, 3.2 Hz, 2,6-HAr), 6.90 (2H, dd, *J* = 8.8, 3.0 Hz, 3,5-HAr), 4.78 (1H, s, 1-H), 3.81 (3H, s, OCH3), 2.89 (1H, dt, *J* = 4.5, 2.0 Hz, 6-Heq,pip), 2.56 (1H, m, 2-Heq,pip), 2.49 (1H, td, *J* = 8.4, 2,7 Hz, 6-Hax,pip), 2.06 (1H, td, *J* = 8.9, 2.7 Hz, 2-Hax,pip), 1.70 (1H, qd, *J* =6.9, 2.7 Hz, 5-Heq,pip), 1.57 (1H, qd, *J* = 8.4, 7.3, 3.0 Hz, 3-Hecq,pip), 1.42 (1H, m, 4-HPip), 1.34 (1H, qd, *J* = 7.6, 4.0, 4.0 Hz, 5-Hax,pip), 1.09 (1H, qd, J = 8.9, 7.7, 3.9 Hz, 3-Hax,pip), 0.92 (3H, d, *J* = 6.4 Hz, 4-CH3). 13C-NMR (100 MHz): *δ* 159.9, 132.1, 129.2, 125.7, 115.9, 114.4, 114.0, 62.2, 55.4, 53.3, 47.3, 34.4, 33.8, 30.5, 21.8. ESI-MS: m/z = 511.1 (2M+ + Na), 267.1 (M+ + Na), 218.3. Anal. Calcd for C15H20N2O: C, 73.74; H, 8.25; N, 11.47. Found: C, 73.55; H, 8.28; N, 12.36.

***2-(3,4-Dimethoxyphenyl)-2-(4-methylpiperidin-1-yl) acetonitrile (5)****.*

Yield 82%, white solid, m.p. 87-88 °C. IR (KBr): 2931, 2885 (νCH3), 2206 (νCN), 1619, 1465 (δAr), 1265 (νC-O-CH3), 833 (vAr) cm-1. 1H-NMR (400 MHz, CDCl3): *δ* 7.08 (1H, ddd, *J* = 5.3, 1.3, 0.8 Hz, 6-HAr), 7.00 (1H, d, *J* = 2.1 Hz, 2-HAr), 6.84 (1H, d, *J* = 8.3 Hz, 5-HAr), 4.78 (1H, s, 1-H), 3.89 (3H, s, OCH3), 3.88 (3H, s, OCH3), 2.88 (1H, dt, *J* = 6.8, 4.6 Hz, 6-Heq,pip), 2.56 (1H, m, 2-Heq,pip), 2.50 (1H, td, *J* = 8.7, 2.7 Hz, 6-Hax,pip), 2.05 (1H, td, *J* = 8.8, 2.6 Hz, 2-Hax,pip), 1.70 (1H, dt, *J* = 7.0, 2.7 Hz, 5-Heq,pip), 1.57 (1H, dt, *J* = 7.7, 2.7 Hz, 3-

Heq,pip), 1.42 (1H, m, 4-HPip), 1.33 (1H, qd, *J* = 8.3, 7.7, 3.9 Hz, 5-Hax,pip), 1.09 (1H, qd, *J* = 8.9, 7.7, 4.0 Hz, 3-Hax,pip), 0.91 (3H, d, *J* = 6.4 Hz, 4-CH3). 13C-NMR (100 MHz, CDCl3): *δ* 149.3, 149.2, 126.1, 120.2, 115.9, 110.7, 110.6, 62.4, 56.1, 56.0, 53.3, 47.3, 34.4, 33.9, 30.5, 21.8. ESI-MS: m/z = 571.1 (2M+ + Na), 275.2 (M+.+ H), 248.3. Anal. Calcd for C16H22N2O2: C, 70.04; H, 8.08; N, 10.21. Found: C, 70.12; H, 8.15; N, 10.13.

***2-(3,4-Methylendioxyphenyl)-2-(4-methyl piperidin-1-yl) acetonitrile (6)****.*

Yield 81%, white solid, m.p. 88-89 °C. IR (KBr): 2931, 2900, 2869 (νCH3), 2221 (νCN), 1604, 1511, 1434 (δAr), 1249 (νC-O-CH3), 863 (νAr) cm-1. 1H-NMR (400 MHz CDCl3): *δ* 7.03 (1H, dd, *J* = 1.8, 0.8 Hz, 6-HAr), 7.00 (1H, ddd, *J* = 2.9, 1.8 1.0 Hz, 2-HAr), 6.79 (1H, d, *J* = 7.9 Hz, 5-HAr), 5.98 (2H, s, OCH2O), 4.73 (1H, s, 1-H), 2.87 (1H, dt, *J* = 8.5, 4.9 Hz, 6-Heq,pip), 2.57 (1H, dt, *J* = 8.9, 3.7 Hz, 2-Heq,pip), 2.50 (1H, td, *J* = 11.2, 2.7 Hz, 6-Hax,pip), 2.07 (1H, td, *J* = 11.5, 2.7 Hz, 2-Hax,pip), 1.71 (1H, dq, *J* = 12.5, 7.0, 2.8 Hz, 5-Heq,pip), 1.59 (1H, dq, *J* = 13.0, 7.3, 3.0 Hz, 3-Heq,pip), 1.42 (1H, m, 4-HPip), 1.33 (1H, qd, *J* = 8.1 7.6, 4.0 Hz, 5-Hax,pip), 1.11 (1H, qd, *J* = 8.7, 7.8, 3.9 Hz, 3-Hax,pip), 0.92 (3H, d, *J* = 6.4 Hz, 4-CH3). 13C-NMR (100 MHz, CDCl3): *δ* 148.3, 148.1, 127.6, 121.4, 115.8, 108.3, 108.2, 101.5, 62.4, 53.3, 47.4, 34.5, 33.9, 30.5, 21.8. ESI-MS: m/z= 539.0 (2M+.+ Na), 281.1 (M+.+ Na), 232.3. Anal. Calcd for C15H18N2O2: C, 69.74; H, 7.02; N, 10.84. Found: C, 69.63; H, 7.17; N, 10.65.

***2-(4-Methoxyphenyl)-2-(2-methylpiperidin-1-yl) acetonitrile (7).***

Yield 66%, white solid, m.p. 57-58 °C. IR (KBr): 2931 (νCH3), 2221 (νCN), 1604, 1511, 1450 (δAr), 1249 (νC-O-CH3), 817 (νAr) cm-1. 1H-NMR (400 MHz, CDCl3): *δ* 7.43 (2H, dd, *J* = 8.5, 3.2 Hz, 2,6-HAr), 6.90 (2H, dd, *J* = 8.8, 3.0 Hz, 3,5-HAr), 5.23 (1H, s, 1-H), 3.81 (3H, s, OCH3), 2.52 (1H, m, 2-HPip), 2.50 (1H, m, 6-Hax,pip), 2.08 (1H, td, J = 8.8, 2.5 Hz, 6-Heq,pip), 1.71 (1H, m, 3-Heq,pip), 1.69 (1H, m, 5-Heq,pip), 1.54 (1H, m, 4-Hax,pip), 1.38 (1H, m, 5-Hax,pip), 1.35 (1H, m, 3-Hax,pip), 1.33 (1H, m, 4-Heq,pip), 1.22 (3-H, d, *J* = 6.1 Hz, 2-CH3). 13C-NMR (100 MHz, CDCl3): *δ* 159.8, 129.1 (2C), 126.3, 115.6, 114.1 (2C), 56.8, 55.6, 55.5, 47.6, 35.3, 25.9, 24.7, 20.6. ESI-MS: m/z = 511.1 (2M+.+ Na), 218.3. Anal. Calcd for C15H20N2O: C, 73.74; H, 8.25; N, 11.47. Found: C, 73.63; H, 8.37; N, 11.32.

***2-(3,4-Dimethoxyphenyl)-2-(2-methylpiperidin-1-yl) acetonitrile (8)****.*

Yield 91%, white solid, m.p. 94-95 °C. IR (KBr): 2962, 2931 (νCH3), 2221 (νCN), 1604, 1511, 1450 (δAr), 1249 (vC-O-CH3), 863 (νAr) cm-1. 1H-NMR (400 MHz, CDCl3): *δ* 7.09 (1H, dd, *J* = 8.3, 1.3 Hz, 6-HAr), 7.00 (1H, d, *J* = 1.5 Hz, 2-HAr), 6.85 (1H, d, *J* = 8.3 Hz, 5-HAr), 5.24 (1H, s, 1-H), 3.89 (3H, s, OCH3), 3.88 (3H, s, OCH3), 2.53 (1H, m, 2-HPip), 2.52 (1H, m, 6-Hax,pip), 2.08 (1H, td, J=11.2 Hz, J=2.3 Hz, 6-Heq,pip), 1.72 (1H, m, 3-Hec,pip), 1.70 (1H, m, 5-Heq,pip), 1.55 (1H, m, 4-Hax,pip), 1.38 (1H, m, 5-Hax,pip), 1.35 (1H, m, 3-Hax,pip), 1.33 (3H, m, 4-Heq,pip), 1.22 (3-H, d, *J* = 6.1 Hz, 2-CH3). 13C-NMR (100 MHz, CDCl3): *δ* 149.3, 126.7, 120.2, 115.5, 110.9, 110.6, 57.1, 56.1, 56.0, 55.6, 55.2, 47.8, 35.3, 26.0, 24.6, 20.5. ESI-MS: m/z = 843.1 (3M+.+ H), 571.1 (2M+.+ Na), 248.3. Anal. Calcd for C16H22N2O2: C, 70.04; H, 8.08; N, 10.21. Found C, 70.13; H, 8.17; N, 10.15.

***2-(3,4-Methylendioxyphenyl)-2-(2-mehylpiperidin-1-yl) acetonitrile (9).***

Yield 68%, white solid, m.p. 80-81 °C. IR (KBr): 2931, 2854 (νCH3), 2190 (νCN), 1604, 1450 (δAr), 1249 (νC-O-CH3), 817 (νAr) cm-1. 1H-NMR (400 MHz, CDCl3): *δ* 7.02 (1H, ddd, *J* = 8.0, 1.7, 0.9 Hz, 6-HAr), 6.99 (1H, d, *J* = 1.6 Hz, 2-HAr), 6.79 (1H, d, *J* = 8.0 Hz, 5-HAr), 5.98 (2H, s, OCH2O), 5.18 (1H, s, 1-H), 2.54 (1H, m, 2-Hpip), 2.52 (1H, m, 6-Heq,pip), 2.08 (1H, td, J = 11.2, 2.6 Hz, 6-Hax,pip), 1.71 (1H, m, 3-Heq,pip), 1.69 (1H, m, 5-Heq,pip), 1.54 (1H, m, 4-Heq,pip), 1.38 (1H, m, 5-Hax,pip), 1.35 (1H, m, 3-Hax,pip), 1.33 (1H, m, 4-Hax,pip), 1.20 (3H, d, *J* = 6.1 Hz, 2-CH3). 13C-NMR (100 MHz, CDCl3): *δ* 148.2, 147.9, 128.2, 121.2, 115.4, 108.1, 108.0, 101.5, 57.0, 55.5, 47.7, 35.3, 25.9, 24.6, 20.6. ESI-MS: m/z = 539.0 (2M+.+ Na), 281.1 (M+.+ Na), 232.3. Anal. Calcd for C15H18N2O2: C, 69.74; H, 7.02; N, 10.84. Found: C, 69.87; H, 6.95; N, 10.70.

***2-(4-Methoxyphenyl)-2-(pyrrolidin-1-yl) acetonitrile (10).***

Yield 63%, yellow oil. IR (KBr): 2221 (νCN), 1249 (νC-O-CH3), 833 (νAr) cm-1. 1H-NMR (400 MHz, CDCl3): *δ* 7.43 (2H, dd, *J* = 8.4, 3.0 Hz, 2,6-HAr), 6.90 (2H, dd, *J* = 8.8, 3.0 Hz, 3,5-HAr), 4.97 (1H, s, 1-H), 3.81 (3H, s, OCH3), 2.63 (4H, m, 2,5-HPyr), 1.82 (4H, m, 3,4-HPyr). 13C-NMR (100 MHz, CDCl3): *δ* 190.9, 159.9, 132.1, 129.0, 126.5, 116.5, 114.4, 114.2, 58.8, 55.7, 55.4, 50.3, 23.5. ESI-MS: m/z = 455.1 (2M+.+ Na), 239.2 (M+ + Na), 217.4 (M+.+

H), 190.5. Anal. Calcd for C13H16N2O: C, 72.19; H, 7.46; N, 12.95. Found: C, 72.01; H, 7.53; N, 13.05.

***2-(4-Methoxyphenyl)-2-morpholineacetonitrile (11).***

Yield 57%, white solid, m.p. 79-80 °C. IR (KBr): 2222 (νCN), 1250 (νC-O-CH3), 1188 (νC-O-C), 864, 818 (vAr) cm-1. 1H-NMR (400 MHz, CDCl3): *δ* 7.42 (2H, dd, *J* = 8.6, 3.0 Hz, 2,6-HAr), 6.91 (2H, dd, *J* = 8.8, 3.0 Hz, 3,5-HAr), 4.75 (1H, s, 1-H), 3.81 (3H, s, OCH3), 2.55 (4H, m, 2,6-HMorph), 3.70 (4H, m, 3,5-HMorph). 13C-NMR (100 MHz, CDCl3): *δ* 160.4, 114.5 (2C), 124.7, 115.9, 129.6 (2C), 67.0 (2C), 62.1, 55.7, 50.3 (2C). ESI-MS: m/z = 487.0 (M+.+ Na), 255.1 (M+.+ Na), 206.3. Anal. Calcd for C13H16N2O2: C, 67.22; H, 6.94; N, 12.06. Found: C, 67.09; H, 7.08; N, 12.15.

**1H- and 13C NMR spectra of the compounds** **3**-**11**


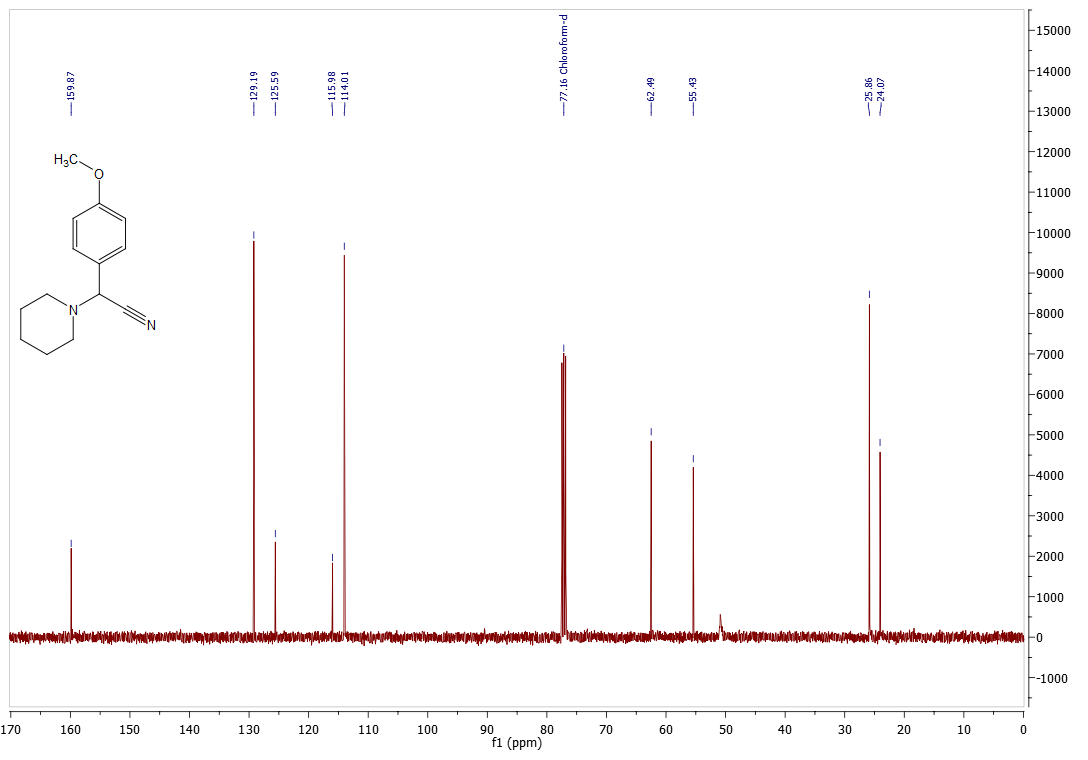
**2-(4-Methoxyphenyl)-2-(piperidin-1-yl) acetonitrile (3)**

**2-(4-Methoxyphenyl)-2-(4-methylpiperidin-1-yl) acetonitrile (4**).

2-(3,4-Dimethoxyphenyl)-2-(4-methylpiperidin-1-yl) acetonitrile (5)

2-(3,4-Methylendioxyphenyl)-2-(4-methylpiperidin-1-yl) acetonitrile (6)

**2-(4-Methoxyphenyl)-2-(2-methylpiperidin-1-yl) acetonitrile (7)**

**2-(3,4-Dimethoxyphenyl)-2-(2-methylpiperidin-1-yl) acetonitrile (8)**

**2-(3,4-Methylendioxyphenyl)-2-(2-mehylpiperidin-1-yl) acetonitrile (9)**

**2-(4-Methoxyphenyl)-2-(pyrrolidin-1-yl) acetonitrile (10)**

**2-(4-Methoxyphenyl)-2-morpholineacetonitrile (11)**

**ESI-MS and FTIR spectra of the compounds 3-11.**

2**-(4-Metoxyphenyl)-2-(piperidin-1-yl) acetonitrile (3)**

**2-(4-Methoxyphenyl)-2-(4-methylpiperidin-1-yl) acetonitrile (4**)

2-(3,4-Dimethoxyphenyl)-2-(4-methylpiperidin-1-yl) acetonitrile (5)

2-(3,4-Methylendioxyphenyl)-2-(4-methylpiperidin-1-yl) acetonitrile (6)

**2-(4-Methoxyphenyl)-2-(2-methylpiperidin-1-yl) acetonitrile (7)**

**2-(3,4-Dimethoxyphenyl)-2-(2-methylpiperidin-1-yl) acetonitrile (8)**

**2-(3,4-Methylendioxyphenyl)-2-(2-mehylpiperidin-1-yl) acetonitrile (9)**

**2-(4-Methoxyphenyl)-2-(pyrrolidin-1-yl) acetonitrile (10)**

**2-(4-Methoxyphenyl)-2-morpholineacetonitrile (11)**
